# Supplementary material for: Glucose Starvation-Induced Rapid Death of Nrf1 α -Deficient, but Not Nrf2-Deficient, Hepatoma Cells Results from Its Fatal Defects in the Redox Metabolism Reprogramming
Source: Hindawi journal article supplement (doi:10.1155/2020/4959821), 2020-07-28
Supplement: f1 [file 4959821.f1.pdf]

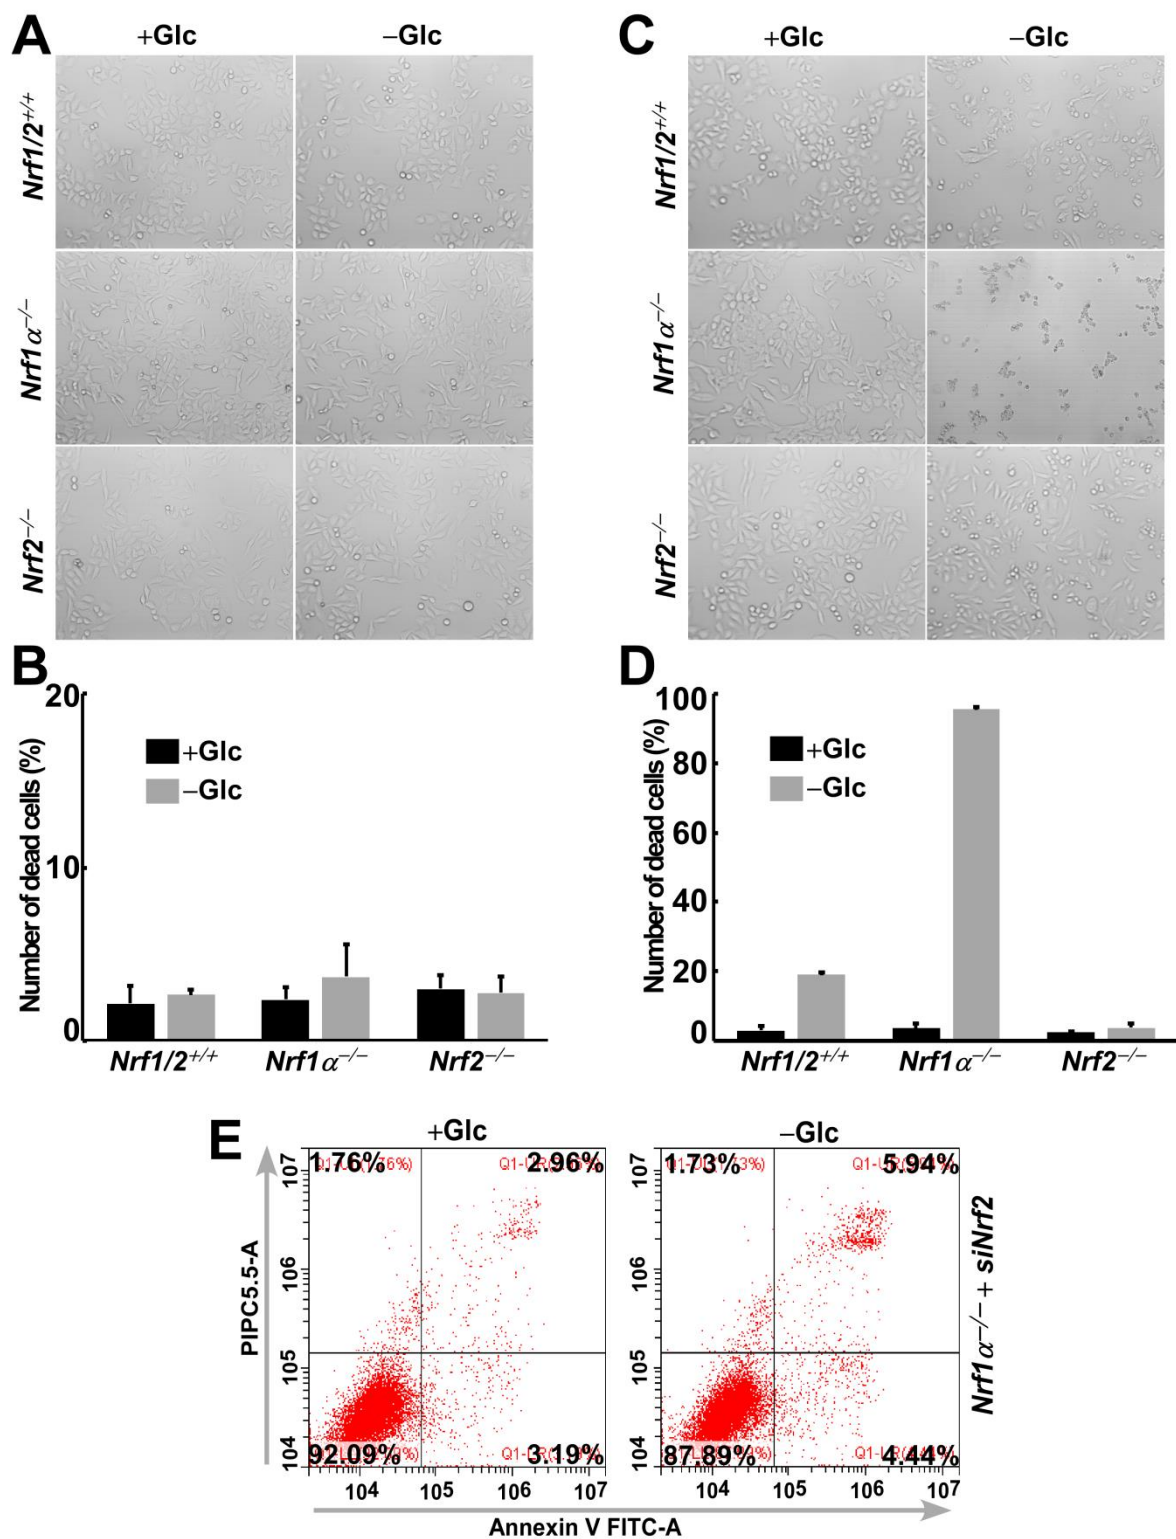

**Figure S1. Distinct cellular responses to glucose deprivation.**

(A,B) *Nrf1/2*<sup>+/+</sup>, *Nrf1α*<sup>-/-</sup> and *Nrf2*<sup>-/-</sup> cells had been starved, or not starved, in glucose-free media for 6 h, before their morphological observation by microscopy (A, with an original magnification of 200×) and counting of dead cells by trypan blue staining (B).

(C,D) The above experimental cells were or were not subjected to glucose starvation for 24 h, before morphological observation (C) and dead cell counting (D).

(E) Apoptosis of *Nrf1α*<sup>-/-</sup> + si*Nrf2* cells, that had been glucose-starved for 12 h, were determined by Flow cytometry.

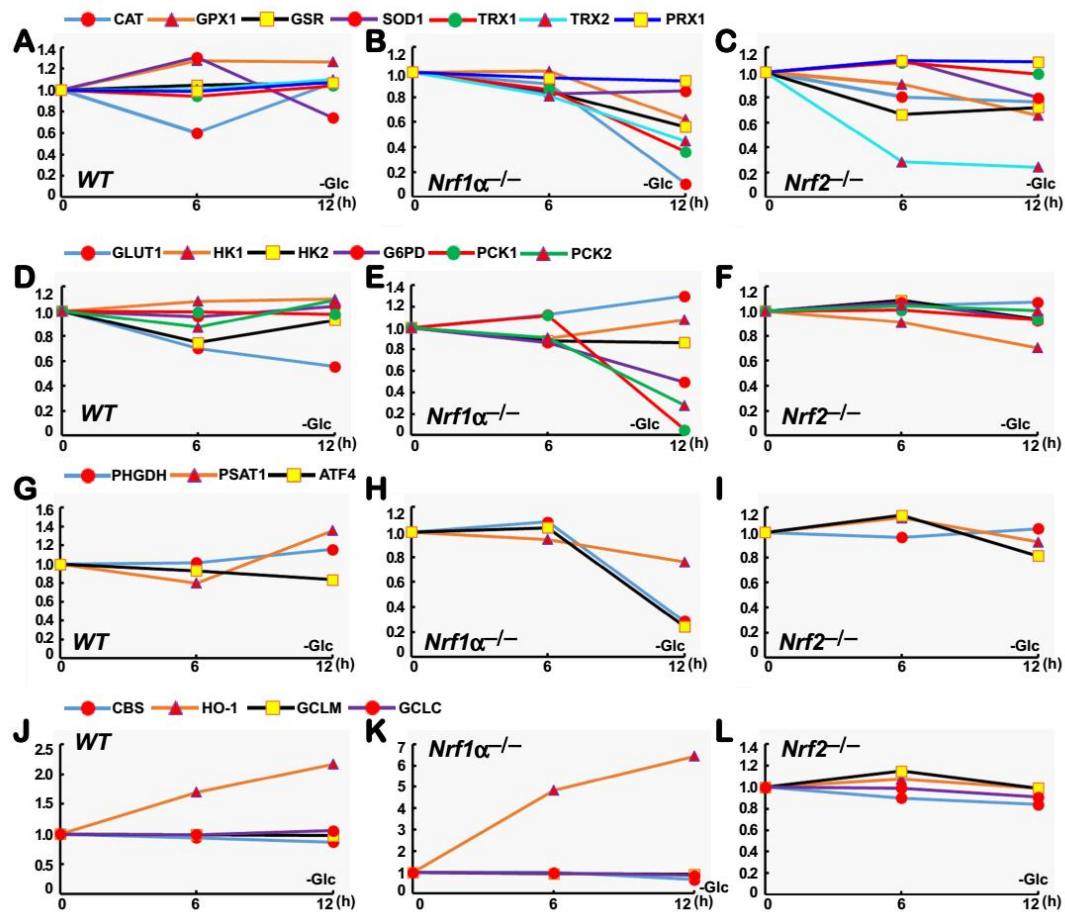

**Figure S2. The quantified results of western blot data in Figure 3, 4 and 5 by Quantity One 4.5.2 software.**

(A-C) According to the western blotting data in Figure 3, The relative protein abundances of the following proteins CAT, GPX1, GSR, SOD1, TRX1, TRX2 and PRX1 in *Nrf1*<sup>+/+</sup> (A), *Nrf1α*<sup>-/-</sup> (B) and *Nrf2*<sup>-/-</sup> (C) were quantified by Quantity One 4.5.2.

(D-F) According to the western blotting data in Figure 4, The relative protein abundances of the following proteins GLUT1, HK1, HK2, G6PD, PCK1 and PCK2 in *Nrf1*<sup>+/+</sup> (D), *Nrf1α*<sup>-/-</sup> (E) and *Nrf2*<sup>-/-</sup> (F) were quantified by Quantity One 4.5.2.

According to the western blotting data in Figure 5, (G-I) The relative protein abundances of the following proteins PHGDH, PSAT1 and ATF4 in *Nrf1*<sup>+/+</sup> (G), *Nrf1α*<sup>-/-</sup> (H) and *Nrf2*<sup>-/-</sup> (I) were quantified by Quantity One 4.5.2. (J-L) The relative protein abundances of the following proteins CBS, HO-1, GCLM and GCLC in *Nrf1*<sup>+/+</sup> (J), *Nrf1α*<sup>-/-</sup> (K) and *Nrf2*<sup>-/-</sup> (L) were quantified by Quantity One 4.5.2.

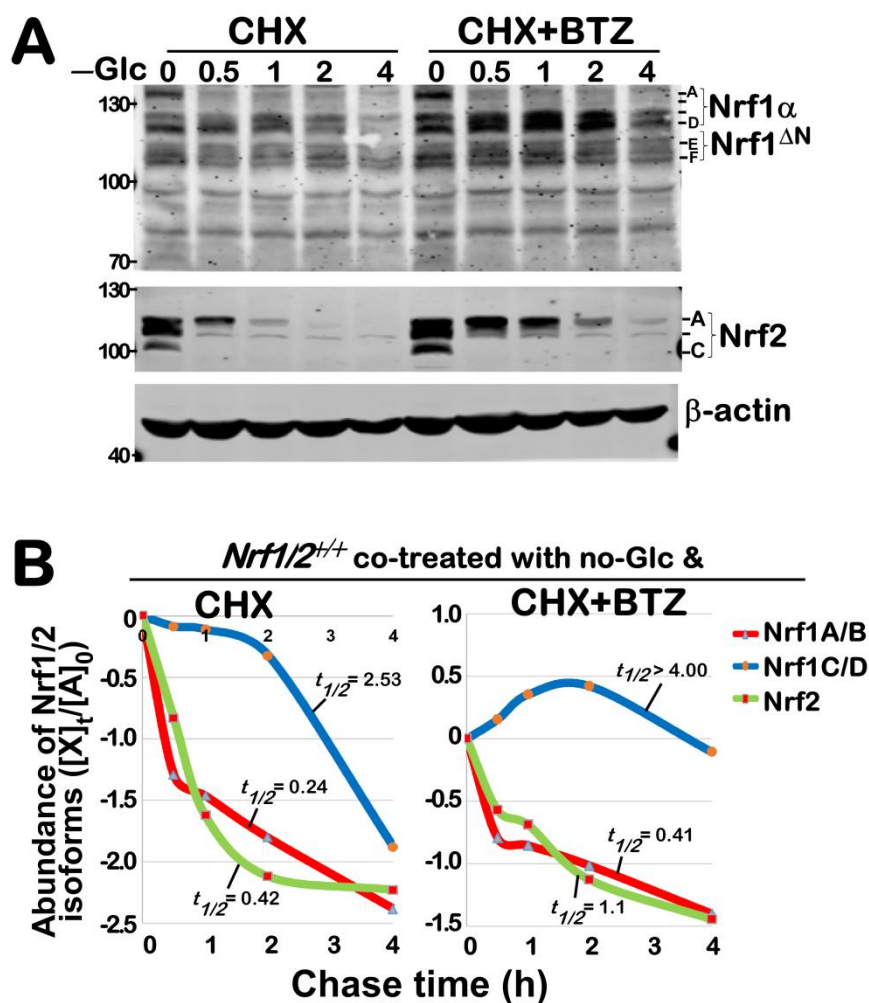

**Figure S3. Time-dependent effects of glucose deprivation on Nrf1 and Nrf2 with distinct half-lives.**

(A) HepG2 cells were, or were not, co-treated for 0-4 h in the glucose-free media to which cycloheximide (CHX, 50  $\mu$ g/ml) alone or plus bortezomib (BTZ, 1  $\mu$ mol/L resoved in DMSO) was added, before being harvested. The total lysates were resolved by SDS-PAGE gels containing 8% and 12% polyacrylamide, followed by Western blotting with antibodies against Nrf1 or Nrf2.

(B) The relative intensity of major protein bands representing Nrf1 and Nrf2 was quantified and shown graphically. The  $[X]_t/[A]_0$  represent the relative amount of indicated protein at the indicated times ( $[A]_t$ ) was normalized to  $[A]_0$ . The half-lives of the major Nrf1 and Nrf2 isoforms were calculated and shown herein.

**Figure S4**

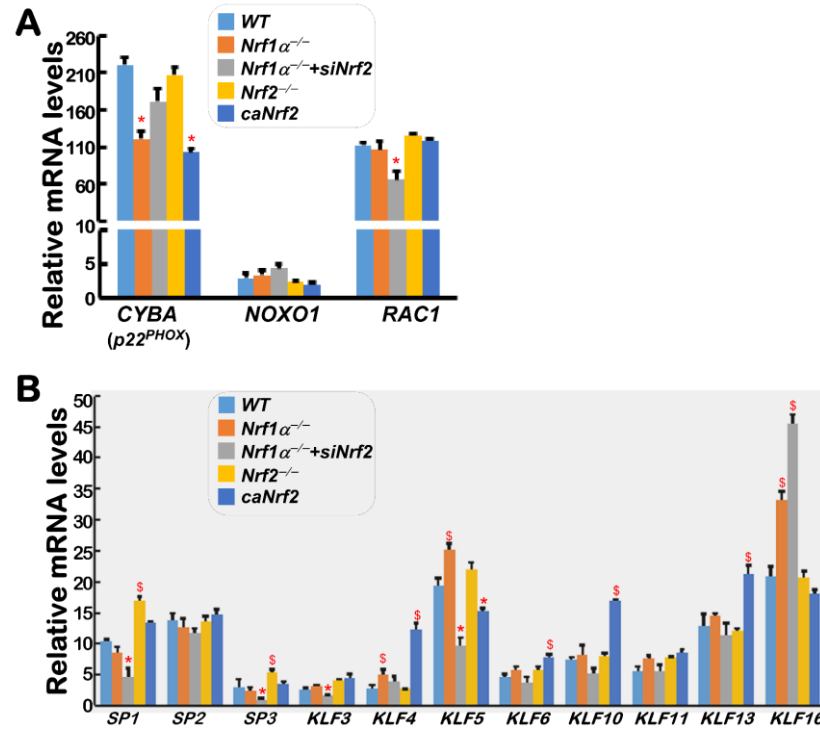

Figure S4. The mRNA expression of *CYBA*, *NOXO1* and *RAC1* in WT, *Nrf1* $\alpha^{-/-}$ , *Nrf1* $\alpha^{-/-}$  + siNrf2, *Nrf2* $^{-/-}$  and *caNrf2* from transcriptomic sequencing (A); The mRNA expression of *SP1*, *SP2*, *SP3*, *KLF3*, *KLF4*, *KLF5*, *KLF6*, *KLF10*, *KLF11*, *KLF13* and *KLF16* in WT, *Nrf1* $\alpha^{-/-}$ , *Nrf1* $\alpha^{-/-}$  + siNrf2, *Nrf2* $^{-/-}$  and *caNrf2* from transcriptomic sequencing (B). NOTE: significant increases (\$,  $p < 0.05$ ) and significant decreases (\* $p < 0.05$ ) were also calculated, relative to the WT.

**Table S1.** The key resources used in this work

| Reagent or Resource      | Source               | Identifier |
|--------------------------|----------------------|------------|
| <b>Antibodies</b>        |                      |            |
| GCLC                     | Sangon Biotechnology | D123963    |
| CAT                      | BIMAKE               | A5291      |
| p <sup>Thr172</sup> AMPK | BIMAKE               | A5740      |
| AMPK                     | BIMAKE               | A5008      |
| ATF4                     | BIMAKE               | A5514      |
| HO1                      | Abcam                | ab52947    |
| GCLM                     | Abcam                | ab126704   |
| GPX1                     | Abcam                | ab108427   |
| Nrf2                     | Abcam                | ab62352    |
| CBS                      | ABclonal             | A1427      |
| Nrf1                     | Zhang's              | (1)        |
| PSMB7                    | ABclonal             | A14771     |
| PSMB6                    | ABclonal             | A4053      |
| PSMB5                    | ABclonal             | A1975      |
| TRX2                     | ABclonal             | A12591     |
| TRX1                     | BIMAKE               | A5894      |
| PRX1                     | BIMAKE               | A5448      |
| SOD1                     | R&D Systems          | AF3418     |
| GSR                      | Sangon Biotechnology | D220726    |
| PCK1                     | Sangon Biotechnology | D261383    |
| PCK2                     | Sangon Biotechnology | D222686    |

|                                                         |                      |                         |
|---------------------------------------------------------|----------------------|-------------------------|
| G6PD                                                    | Zen-bioscience       | 381826                  |
| GLUT1                                                   | ABclonal             | A11208                  |
| HK1                                                     | Sangon Biotechnology | D221854                 |
| HK2                                                     | ABclonal             | A0994                   |
| PHGDH                                                   | ABclonal             | A10461                  |
| PSAT1                                                   | ABclonal             | A6707                   |
| β-actin                                                 | ZSGB-BIO             | TA-09                   |
| <b>Chemicals</b>                                        |                      |                         |
| Trypan Blue                                             | Solarbio             | C0040                   |
| 3-Methyladenine                                         | MedChem Express      | HY-19312                |
| Ferrostatin-1                                           | MedChem Express      | HY-100579               |
| Necrostatin-1                                           | MedChem Express      | HY-15760                |
| Q-VD-OPH                                                | TargetMol            | T0282                   |
| Fructose                                                | Sangon Biotechnology | A600213                 |
| Mannose                                                 | Sangon Biotechnology | A600554                 |
| DHA(Dehydroacetic acid)                                 | Sangon Biotechnology | A602491                 |
| Catalase                                                | Sangon Biotechnology | A001896                 |
| NAC (N-Acetyl-L-cysteine)                               | Sangon Biotechnology | A601127                 |
| Glutamine                                               | Gibco                | 25030149                |
| Penicillin-Streptomycin                                 | Invitrogen           | 15140122                |
| PMSF                                                    | Sangon               | A100754                 |
| Protease inhibitors                                     | Roche                | 3271382-1               |
| RIPA                                                    | Beyotime             | P0013C                  |
| <b>Oligonucleotides for small interference (si) RNA</b> |                      |                         |
| Normal control FW                                       | Tsingke              | UUCUCCGAACGUGUCACGUdTdT |

|                    |         |                         |
|--------------------|---------|-------------------------|
| Normal control REV | Tsingke | ACGUGACACGUUCGGAGAAdTdT |
| siNrf2 FW          | Tsingke | GUAAGAAGCCAGAUGUUAAdTdT |
| siNrf2 REV         | Tsingke | UUAACAUCUGGCUUCUACdTdT  |

---

**Oligonucleotides for qPCR**

---

|          |         |                         |
|----------|---------|-------------------------|
| Nrf1 FW  | Tsingke | GCTGGACACCATCCTGAATC    |
| Nrf1 REV | Tsingke | CCTTCTGCTTCATCTGTCGC    |
| Nrf2 FW  | Tsingke | TCAGCGACGGAAAGAGTATGA   |
| Nrf2 REV | Tsingke | CCACTGGTTTCTGACTGGATGT  |
| CAT FW   | Tsingke | TTCTGTTGAAGATGCGGCG     |
| CAT REV  | Tsingke | GATGTAAAAAGTCCAGGAGGGGT |
| SOD1 FW  | Tsingke | ATCCTCTATCCAGAAAACACGGT |
| SOD1 REV | Tsingke | CAAGCCAAACGACTTCCAGC    |
| SOD2 FW  | Tsingke | AATAGCTGGGATTACAGGTGCAT |
| SOD2 REV | Tsingke | CCAGACGGATCACTTGAGGTCAG |
| GPX1 FW  | Tsingke | CAGTCGGTGTATGCCTTCTCG   |
| GPX1 REV | Tsingke | GAGGGACGCCACATTCTCG     |
| GSR FW   | Tsingke | CACGAGTGATCCCAAGCCC     |
| GSR REV  | Tsingke | CAATGTAACCTGCACCAACAATG |
| NOX4 FW  | Tsingke | CGGCAGAGTTTACCCAGCAC    |
| NOX4 REV | Tsingke | AAGGTCCAGAAATCCAAAGCC   |
| TRX1 FW  | Tsingke | AGCCTTTCTTTCATGATGTTGC  |
| TRX1 REV | Tsingke | ATTGGCTCCAGAAAATTCACCC  |
| TRX2 FW  | Tsingke | CCTGACTGTAACACCCAACCC   |
| TRX2 REV | Tsingke | CACCATCTTCTCTAACCTCGGC  |
| PRX1 FW  | Tsingke | GAAGGCATCTCGTTCAGGG     |

|           |         |                         |
|-----------|---------|-------------------------|
| PRX1 REV  | Tsingke | CCAACAGGGAGGTCATTTACA   |
| PRX2 FW   | Tsingke | GCTGTCGGACTACAAAGGGA    |
| PRX2 REV  | Tsingke | CAAGCCAGGTGGGTGAACT     |
| CBS FW    | Tsingke | CAGTTCAAACAGATCCGCCTCAC |
| CBS REV   | Tsingke | TGTGGTACTGGATCTGCTCGTG  |
| CTH FW    | Tsingke | ACACTTCCAACATTTGCGCA    |
| CTH REV   | Tsingke | GTGCTGCCACTGCTTTTCA     |
| ATF4 FW   | Tsingke | CCCTTCACCTTCTTACAACCTC  |
| ATF4 REV  | Tsingke | TGCCCAGCTCTAAACTAAAGGA  |
| PHGDH FW  | Tsingke | GAAATCTCTCACGGGGGTTG    |
| PHGDH REV | Tsingke | GTTCACATCCGCCTGCTTG     |
| PSAT1 FW  | Tsingke | ACCTCAACCCAGATGCCTC     |
| PSAT1 REV | Tsingke | TCACGGACAATCACCACGG     |
| PSPH FW   | Tsingke | TGTCCTCCTGCTGATGCTTT    |
| PSPH REV  | Tsingke | ATACCATTTGGCGTTATCCTTG  |
| PSMB5 FW  | Tsingke | GCTGTTGGCTCGGCAATGT     |
| PSMB5 REV | Tsingke | GCCTCTCTTATCCCAGCCACAG  |
| PSMB6 FW  | Tsingke | TCAAGAAGGAGGGCAGGTGT    |
| PSMB6 REV | Tsingke | GTAAAGTGGCAACGGCGAA     |
| PSMB7 FW  | Tsingke | CTGTGTCGGTGTATGCTCCA    |
| PSMB7 REV | Tsingke | TGCCAGTTTTCCGGACCTTT    |
| PC FW     | Tsingke | CTGAATACTCGCCTCTTCCTGC  |
| PC REV    | Tsingke | CTTCATGGCCTGGGTGTCCTTG  |
| PCK2 FW   | Tsingke | AGTAGAGAGCAAGACGGTGAT   |
| PCK2 REV  | Tsingke | AGTAGAGAGCAAGACGGTGAT   |



|             |         |                         |
|-------------|---------|-------------------------|
| FBP1 FW     | Tsingke | CTCTATGGCATTGCTGGTTCTAC |
| FBP1 REV    | Tsingke | GGTTCCACTATGATGGCGTGT   |
| GLUT1 FW    | Tsingke | ATTGGCTCCGGTATCGTCAAC   |
| GLUT1 REV   | Tsingke | GCTCAGATAGGACATCCAGGGTA |
| HK1 FW      | Tsingke | CACATGGAGTCCGAGGTTTATG  |
| HK1 REV     | Tsingke | CGTGAATCCCACAGGTAACCTC  |
| HK2 FW      | Tsingke | GAGCCACCACTACCCTACT     |
| HK2 REV     | Tsingke | CCAGGCATTCGGCAATGTG     |
| PFKL FW     | Tsingke | GGCTTCGACACCCGTGTAA     |
| PFKL REV    | Tsingke | CGTCAAACCTCTTGTCATCCA   |
| LDHA FW     | Tsingke | ATGGCAACTCTAAAGGATCAGC  |
| LDHA REV    | Tsingke | CCAACCCCAACAACCTGTAATCT |
| GCLC FW     | Tsingke | TCAATGGGAAGGAAGGTGTGTT  |
| GCLC REV    | Tsingke | TTGTAGTCAGGATGGTTTGCGA  |
| GCLM FW     | Tsingke | TGCTGTGTGATGCCACCAGA    |
| GCLM REV    | Tsingke | CGCTTGAATGTCAGGAATGCTT  |
| NQO1 FW     | Tsingke | AAGAAGAAAGGATGGGAGGTGG  |
| NQO1 REV    | Tsingke | GAACAGACTCGGCAGGATACTGA |
| HO-1 FW     | Tsingke | CAGAGCCTGGAAGACACCCTAA  |
| HO-1 REV    | Tsingke | AAACCACCCCAACCCTGCTAT   |
| β-actin FW  | Tsingke | CATGTACGTTGCTATCCAGGC   |
| β-actin REV | Tsingke | CTCCTTAATGTCACGCACGAT   |

---

**Oligonucleotides for construct**

|               |         |                                                             |
|---------------|---------|-------------------------------------------------------------|
| CAT-ARE#1 FW  | Tsingke | cATTGCTGACTTTTTAAGAGCTGAGAAAGCATAGCTATGGAGCGCAAGGCc         |
| CAT-ARE#1 REV | Tsingke | tcgagGCCTTGCGCTCCATAGCTATGCTTTCTCAGCTCTTAAAAAGTCAGCAATggtac |

|                  |         |                                                              |
|------------------|---------|--------------------------------------------------------------|
| CAT-ARE#2 FW     | Tsingke | cAAATCCCACCTTCTTCTTTGGCTTGCTCAAGCCTGTTCCACAGTGAACAc          |
| CAT-ARE#2 REV    | Tsingke | tcgagTGTTCACTGTGGAACAGGCTTGAGCAAGCCAAAGAAGAAGGTGGGATTTggtac  |
| CAT-ARE#3 FW     | Tsingke | cGAGACAGGGTTTTGCCATGTTGACCAGGCTGGTCTTGAACCTCTGACCTc          |
| CAT-ARE#3 REV    | Tsingke | tcgagAGGTCAGGAGTTCAAGACCAGCCTGGTCAACATGGCAAAACCCTGTCTCggtac  |
| CAT-ARE#4 FW     | Tsingke | cTGTTTTTGAGACGGAGTCTTGCTCTGTCAACCGGGCTGGAGTGCAGTGgc          |
| CAT-ARE#4 REV    | Tsingke | tcgagCCACTGCACTCCAGCCCGGGTGACAGAGCAAGACTCCGTCTCAAAAACAggtac  |
| CAT-ARE#5 FW     | Tsingke | cCCGCTGCACTCCAGCCTGGGTGACAGAGCGAGACTTCGTCTCAAAAAAAc          |
| CAT-ARE#5 REV    | Tsingke | tcgagTTTTTTTGTAGACGAAGTCTCGCTCTGTCAACCGGCTGGAGTGCAGCGGggtac  |
| G6PD-ARE#6 FW    | Tsingke | cCGGGAAGCCGGCGAGAAGTGTGAGGCCGCGGTAGGGCCGCATCCCGCTCc          |
| G6PD-ARE#6 REV   | Tsingke | tcgagGAGCGGGATGCGGCCCTACCGCGGCCTCACACTTCTCGCCGGCTTCCCGggtac  |
| G6PD-ARE#7 FW    | Tsingke | cTCCCGCTCCGGAGAGAAGTCTGAGTCCGCCAGGCTCTGCAGGCCCGCGGc          |
| G6PD-ARE#7 REV   | Tsingke | tcgagCCGCGGGCTGCAGAGCCTGGCGGACTCAGACTTCTCTCCGGAGCGGGAggtac   |
| G6PD-ARE#8 FW    | Tsingke | cAATTTAACGACCTCGATAGAGCGCAGTCAAGTTTGGTGAACAGAATATGc          |
| G6PD-ARE#8 REV   | Tsingke | tcgagCATATTCTGTTACCAAACCTTGACTGCGCTCTATCGAGGTCGTTAAATTggtac  |
| G6PD-ARE#9 FW    | Tsingke | cACCACTGCACTCCAGCCTGGTGACAGAGCGAGATTCTGTCTCAAAAAAAc          |
| G6PD-ARE#9 REV   | Tsingke | tcgagTTTTTTTGTAGACAGAATCTCGCTCTGTCAACAGGCTGGAGTGCAGTGGTggtac |
| G6PD-ARE#10 FW   | Tsingke | cTTCTACTTGTTATCTAGTAGCCTTCTCAAAACGAACCTCTCTAAGACCc           |
| G6PD-ARE#10 REV  | Tsingke | tcgagGGTCTTAGAGAGGTTTCGTTTTGAGAAGGCTACTAGATAACCAAGTAGAAggtac |
| G6PD-ARE#11 FW   | Tsingke | cTGCTGGCTACTCCTGCCCAGGCACTCTCACTGGGTTCCTATCCTTCATGc          |
| G6PD-ARE#11 REV  | Tsingke | tcgagCATGAAGGATGGGAACCCAGTGAGAGTGCCTGGGCAGGAGTAGCCAGCAggtac  |
| G6PD-ARE#12 FW   | Tsingke | cGACTGCCTCGGAGACTGGAGTGAGGCAGCCACAAGCCCAGGAATAAATGc          |
| G6PD-ARE#12 REV  | Tsingke | tcgagCATTTATCCTGGGCTTGTGGCTGCCTCACTCCAGTCTCCGAGGCAGTCggtac   |
| PHGDH-ARE#13 FW  | Tsingke | cATAAAGCGGGCAGGGATTTGGCAACCTCAGAGCCGCGAGGAGGAGGCGGc          |
| PHGDH-ARE#13 REV | Tsingke | tcgagCCGCCTCCTCCTCGCGGCTCTGAGGTTGCCAAATCCCTGCCCGCTTTATggtac  |
| PHGDH-ARE#14 FW  | Tsingke | cCATTTCTGTAAAATGGGGCATGAGAGAGCACGTCGGTTATGGGGTTTAAc          |

|                  |         |                                                             |
|------------------|---------|-------------------------------------------------------------|
| PHGDH-ARE#14 RW  | Tsingke | tcgagTTAAACCCATAACCGACGTGCTCTCTCATGCCCATTTTACAGAAATGggtac   |
| PHGDH-ARE#15 FW  | Tsingke | cGAGCAGCCCCTGGCCCCTCTGCAGTCTCACCTCCTGGTATCCCACTGGCc         |
| PHGDH-ARE#15 REV | Tsingke | tcgagGCCAGTGGGATACCAGGAGGTGAGACTGCAGAGGGGCCAGGGGCTGCTCggtac |
| PCK2-ARE#16 FW   | Tsingke | cTGGATTGTGGAGAGAAAGAATGACCAGGCCGGGCGTGGTGGCTCACGCCc         |
| PCK2-ARE#16 REV  | Tsingke | tcgagGGCGTGAGCCACCACGCCCGGCCTGGTCATTCTTTCTCTCCACAATCCAggtac |
| PCK2-ARE#17 FW   | Tsingke | cCCTTGATTCTCCCTTAGGGTGACCGAGCAAATGACTCTTTAAGCCCGTc          |
| PCK2-ARE#17 REV  | Tsingke | tcgagACGGGCTTAAAGAGTCATTTGCTCGGTACCCCTAAGGGAAGAATCAAGGggtac |
| PCK2-ARE#18 FW   | Tsingke | cGAAGCGGGCATTGCATTTGGTGAGACAGCTCCCTTTGGCCACAGATAGTc         |
| PCK2-ARE#18 REV  | Tsingke | tcgagACTATCTGTGGCCAAAGGGAGCTGTCTACCAAATGCAATGCCCGCTTCggtac  |
| ATF4-ARE#19 FW   | Tsingke | cCAGAGTTTAGGAGGAGCCATGCAGACTCAGCCGGCCTTTGGGGGTAGGTc         |
| ATF4-ARE#19 REV  | Tsingke | tcgagACCTACCCCCAAAGGCCGGCTGAGTCTGCATGGCTCCTCCTAAACTCTGggtac |
| ATF4-ARE#20 FW   | Tsingke | cAATAATAATGAAGAGTCCTCTGAGGCAGCAGGAGGATGTGATGGAGAc           |
| ATF4-ARE#20 REV  | Tsingke | tcgagTCTCCATCACATCCTCCTGCTGCCTCAGAGGACTCTTCATTATTATTggtac   |
| ATF4-ARE#21 FW   | Tsingke | cACTTTAATACTCAACCATTTGCACAGTCATCTGTCAGGAGGTACTGTCTc         |
| ATF4-ARE#21 RW   | Tsingke | tcgagAGACAGTACCTCCTGACAGATGACTGTGCAAATGGTTGAGTATTAAAGTggtac |
| ATF4-ARE#22 FW   | Tsingke | cCCATGATACTTCCTTGGGACTGACTTGGCTGAGAACGTGTTCTGTCAGAc         |
| ATF4-ARE#22 REV  | Tsingke | tcgagTCTGACAGAACACGTTCTCAGCCAAGTCAGTCCCAAGGAAGTATCATGGggtac |
| ATF4-ARE#23 FW   | Tsingke | cTGTCATATTCCACATTTGCTGACTGTGCTCCCTGCACTCCACTCAAGTc          |
| ATF4-ARE#23 REV  | Tsingke | tcgagACTTGAGTGGAGTGCAGGGAGCACAGTCAGCAAATGTGGAATATGGACAggtac |
| ATF4-ARE#24 FW   | Tsingke | cCCTGGTGGGTTTGCTGACCATGACTGGGCAAGCCGTTCTTTTGTGCCC           |
| ATF4-ARE#24 REV  | Tsingke | tcgagGGCAGCAAAAAGAACGGCTTGCCCAGTCATGGTCAGCAAACCCACCAGGggtac |

---

#### Recombinant DNA

|               |            |         |
|---------------|------------|---------|
| pcDNA3.1      | Invitrogen | V79020  |
| pGL3-promoter | Promega    | VQP0124 |
| pRL-TK        | Promega    | VQP0126 |

---

| Software and Algorithms |                 |                                                                                 |
|-------------------------|-----------------|---------------------------------------------------------------------------------|
| Canvas 9                | Canas GFX, Inc. | <a href="https://www.canvasgfx.com/">https://www.canvasgfx.com/</a>             |
| Excel                   | Microsoft       | <a href="https://www.microsoft.com/">https://www.microsoft.com/</a>             |
| FlowJo 7.6.1            | FlowJo          | <a href="https://www.flowjo.com/">https://www.flowjo.com/</a>                   |
| CFX Manager 3.1         | Bio-Rad         | <a href="https://bio-rad-cfx-manager.com/">https://bio-rad-cfx-manager.com/</a> |

1. Zhang, Y., and Hayes, J. D. (2010) Identification of topological determinants in the N-terminal domain of transcription factor Nrf1 that control its orientation in the endoplasmic reticulum membrane. *The Biochemical journal* **430**, 497-510
